# Supplementary material for: Enhancing Employees' Social Responsibility: The Roles of Continuous Improvement, Organization Identification, and Perceived Organization Support
Source: Preprints.org preprint supplement (doi:10.20944/preprints202409.1053.v1), 2024-09-13

## Ethical Clearance Approval

| Information about the Research Project |                                                                                                                                       |
|----------------------------------------|---------------------------------------------------------------------------------------------------------------------------------------|
| Project Title (English)                | Empowerment and its Role in Facilitating Employee Contributions to Achieve Social Responsibility Goals in Saudi Arabian Organizations |
| Project Number                         | UP-Promising – 19 - 1445                                                                                                              |
| Mobile Number                          | 0567220449                                                                                                                            |
| Official Email                         | <a href="mailto:rbalmasradi@ub.edu.sa">rbalmasradi@ub.edu.sa</a>                                                                      |
|                                        | University of Bisha                                                                                                                   |
| Approval Date                          | 15-01-2024                                                                                                                            |
| Approval Validity                      | One year                                                                                                                              |

The details submitted by the applicant related to the above-mentioned research project, The Deanship of Graduate Studies and Scientific Research at University of Bisha grants its ethical approval to the procedure. This approval is subject to an audit or any other form of monitoring by the Deanship at any time. The Deanship requests a regular report on the progress of the project to ensure that researchers are complying with the highest ethical standards. The researchers are held responsible for storage, safety and security of original data obtained from the projects. Any substantial alterations to the circumstances regarding events or matters that may affect the ethical acceptability of a project must be reported immediately to the Deanship via email [[dsr@ub.edu.sa](mailto:dsr@ub.edu.sa)] or phone [+966 17 623 8451]

| Chairman of the Scientific Research Ethics Committee |                                                                                      |
|------------------------------------------------------|--------------------------------------------------------------------------------------|
| Name (Arabic)                                        | د. سامي الغامدي                                                                      |
| Name (English)                                       | Dr. Sami Al-Ghamdi                                                                   |
| Date                                                 | 15-01-2024                                                                           |
| Signature                                            |  |

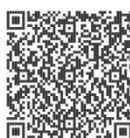

Supplement: Supplementary file 1 [file supplementary]
